# Supplementary material for: Insights into the electrochemical processes of rechargeable magnesium–sulfur batteries with a new cathode design
Source: Royal Society of Chemistry journal article supplement (doi:10.1039/c9ta09155f), 2019-01-01
Supplement: c9ta09155f1.pdf [file c9ta09155f1.pdf]

## Supporting Information

### Insights into the electrochemical processes of rechargeable Magnesium-Sulfur batteries with new cathode design

*Bhaghavathi P. Vinayan* <sup>\*a</sup>, *Holger Euchner* <sup>a</sup>, *Zhirong Zhao-Karger* <sup>b</sup>, *Musa Ali Cambaz* <sup>a</sup>,  
*Zhenyou Li* <sup>b</sup>, *Thomas Diemant* <sup>c</sup>, *R. Jürgen Behm* <sup>a,c</sup>, *Axel Gross* <sup>a,d</sup>, *Maximilian Fichtner* <sup>a,b</sup>

<sup>a</sup>Helmholtz Institute Ulm (HIU) Electrochemical Energy Storage, Helmholtzstr. 11,  
D-89081 Ulm, Germany

<sup>b</sup>Institute of Nanotechnology, Karlsruhe Institute of Technology (KIT),  
P.O. Box 3640, D-76021 Karlsruhe, Germany

<sup>c</sup> Institute of Surface Chemistry and Catalysis, Ulm University, Albert-Einstein-Allee 47, D-89081 Ulm, Germany

<sup>d</sup> Institute of Theoretical Chemistry, Ulm University, Albert-Einstein-Allee 11, D-89081 Ulm, Germany

[\\*vinayan.parambath@kit.edu](mailto:vinayan.parambath@kit.edu)

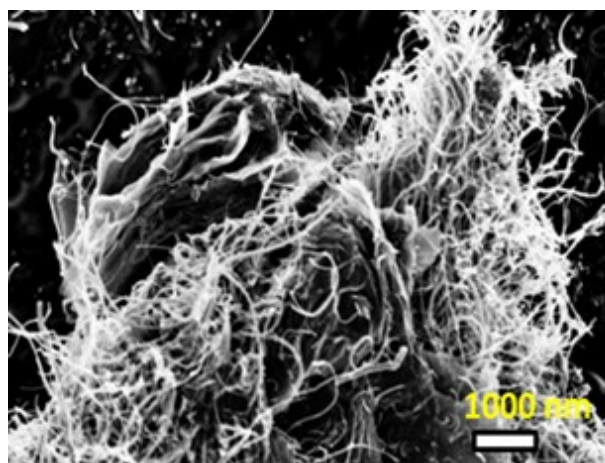

**Fig. S1:** SEM images of nitrogen doped (G-MWCNT) nanocomposite (NC).

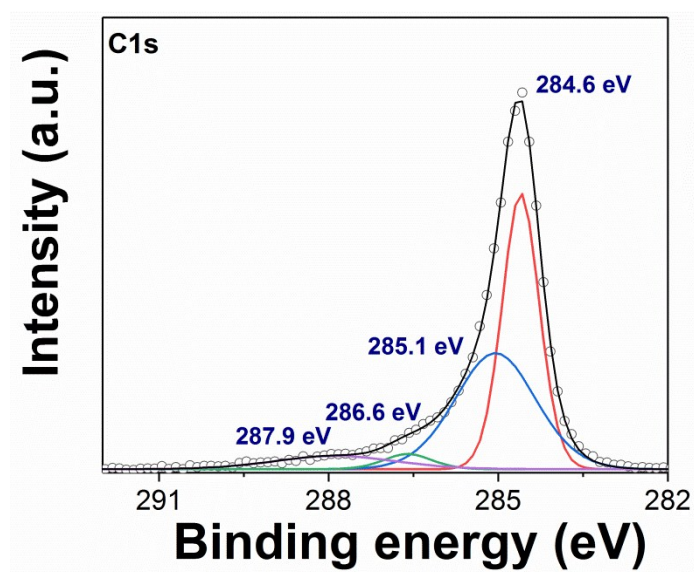

**Fig. S2:** C1s - XPS spectra of sulfur loaded NC.

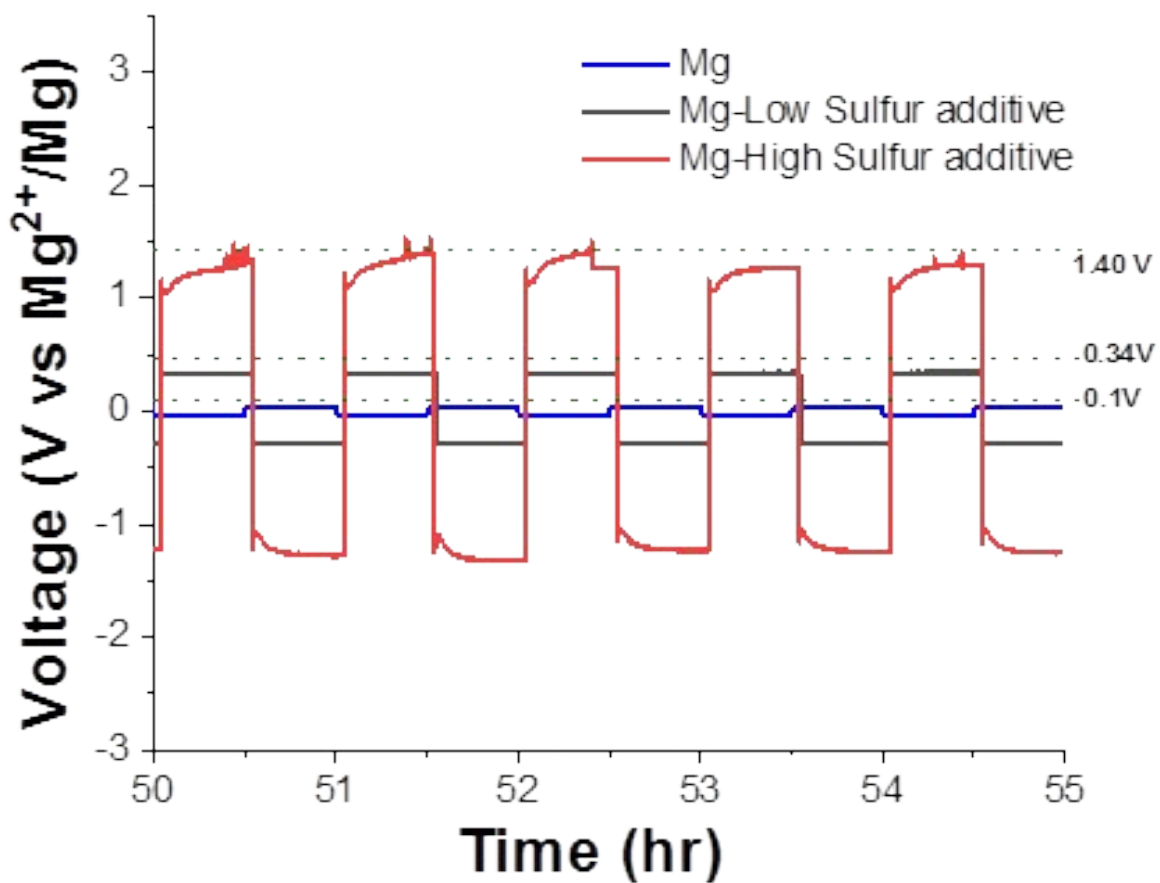

**Fig. S3:** Stripping/plating in an Mg/Mg symmetric cell with pure Mg electrolyte and electrolytes containing low and high amounts of sulfur additive, respectively. The graph demonstrates the growth of overvoltage with sulfur additive concentration.

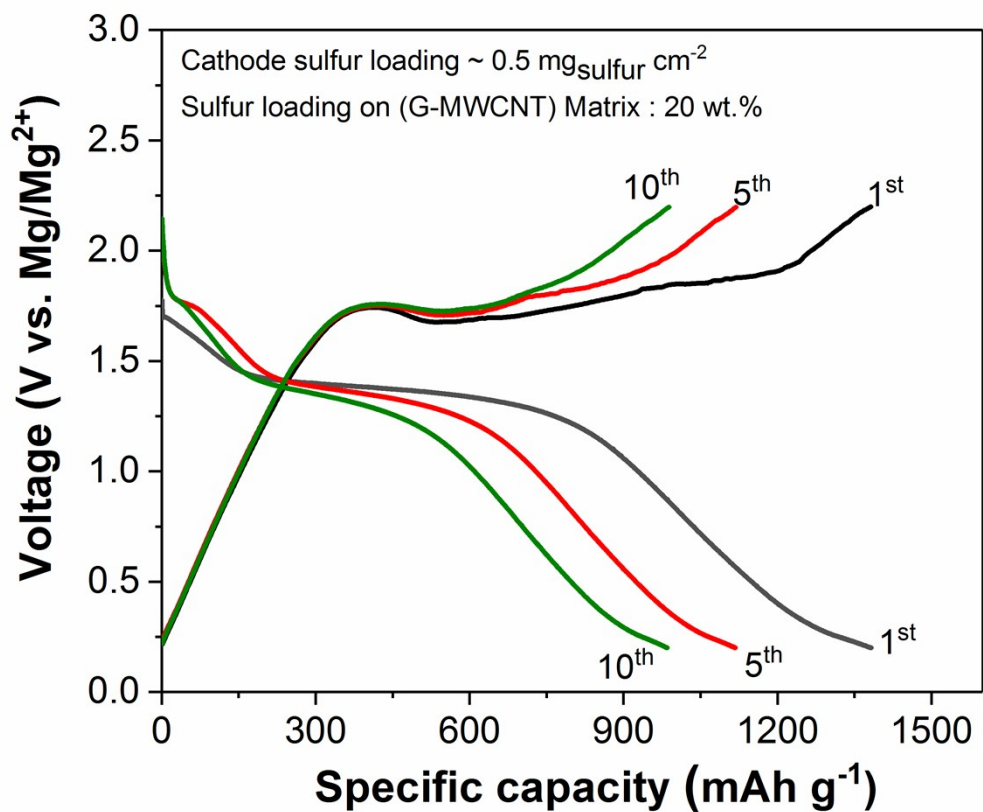

**Fig. S4:** Charge/discharge voltage profiles for the S/NC cathode with low sulfur loading  $\sim 0.5 \text{ mg}_{\text{sulfur}} \text{ cm}^{-2}$ . The sulfur loading on (G-MWCNT) matrix: 20 wt. %.

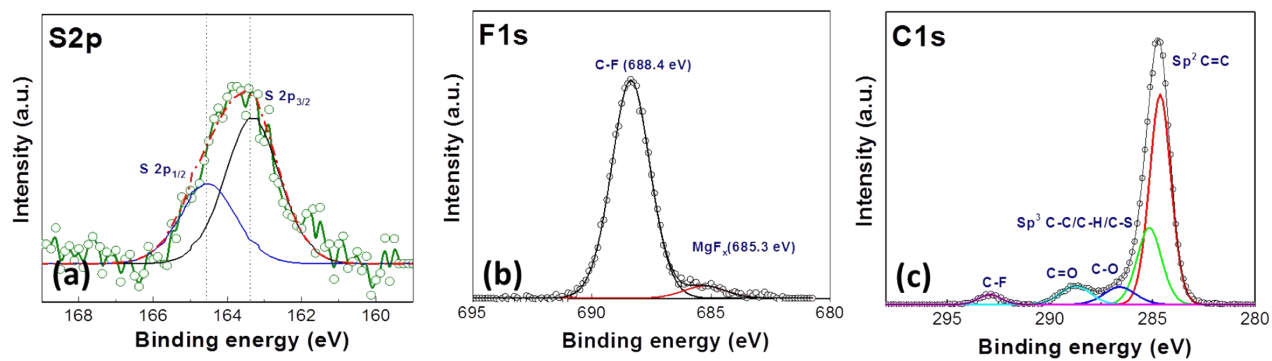

**Fig. S5:** (a) S2p, (b) F1s, and (c) C1s XP, detail spectra of the cycled Mg anode.

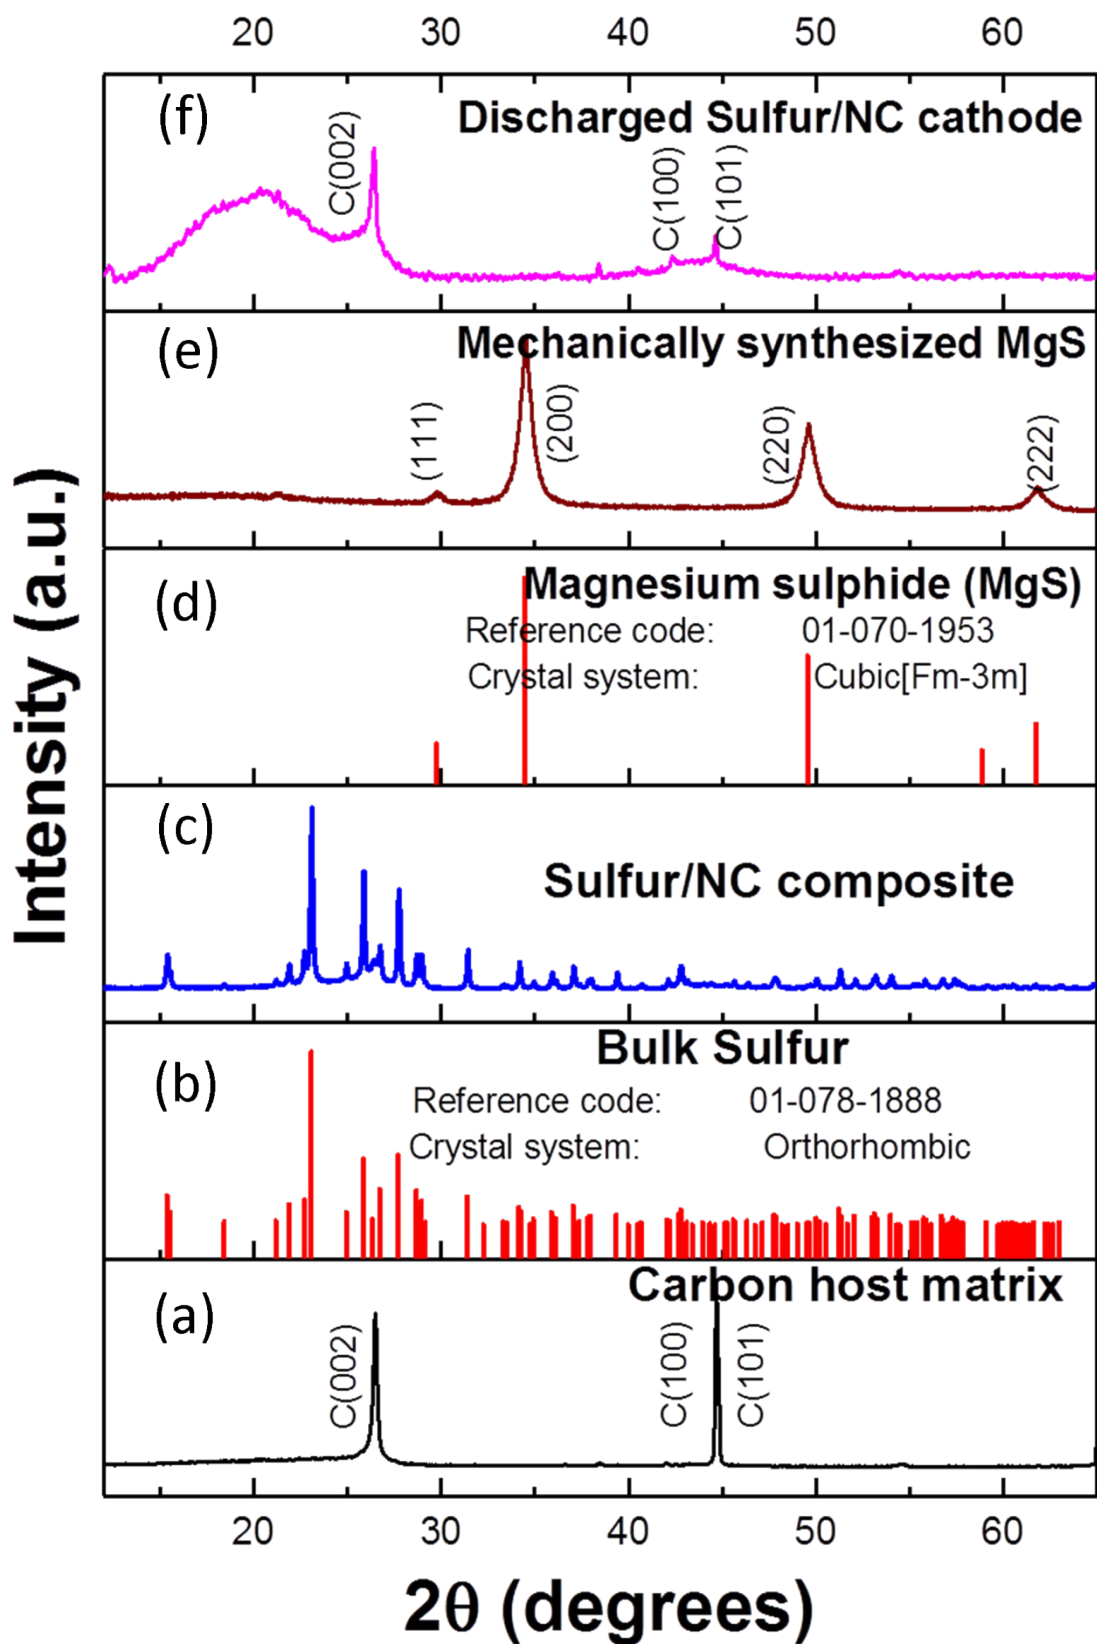

**Fig. S6:** XRD spectra of pristine sulfur cathode, discharged sulfur cathode, and mechanically synthesized MgS.

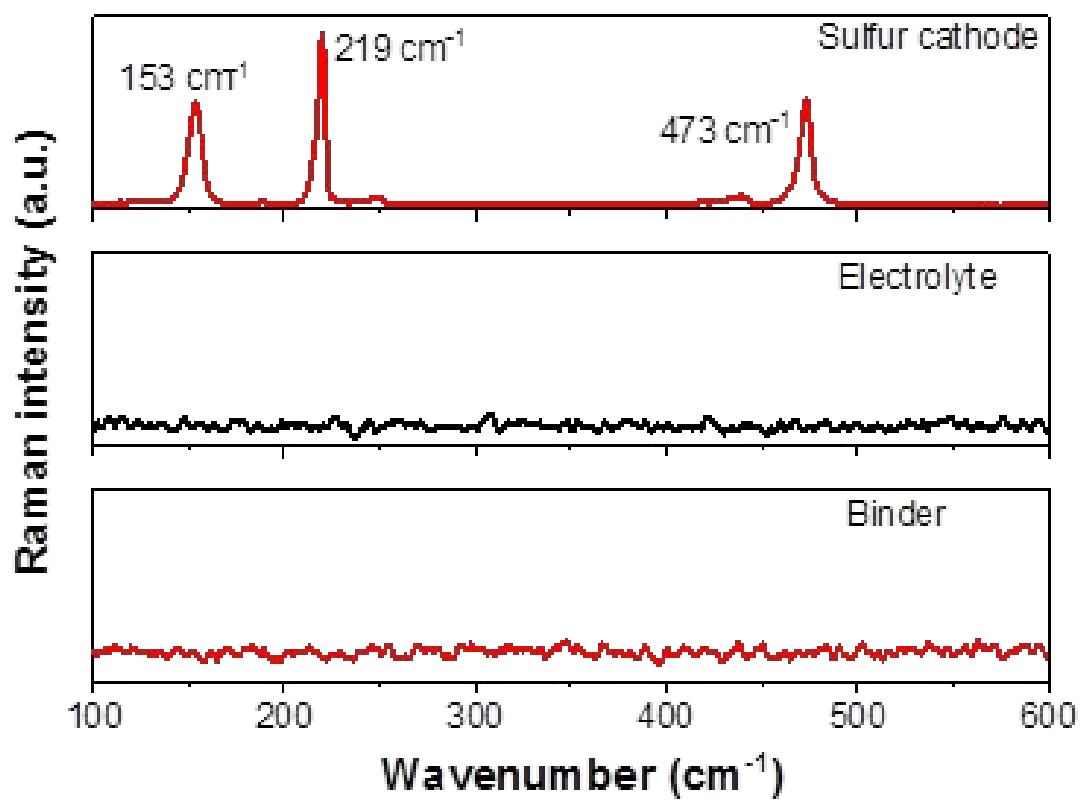

**Fig. S7:** Raman spectra of sulfur cathode, pure electrolyte and binder.

(a)

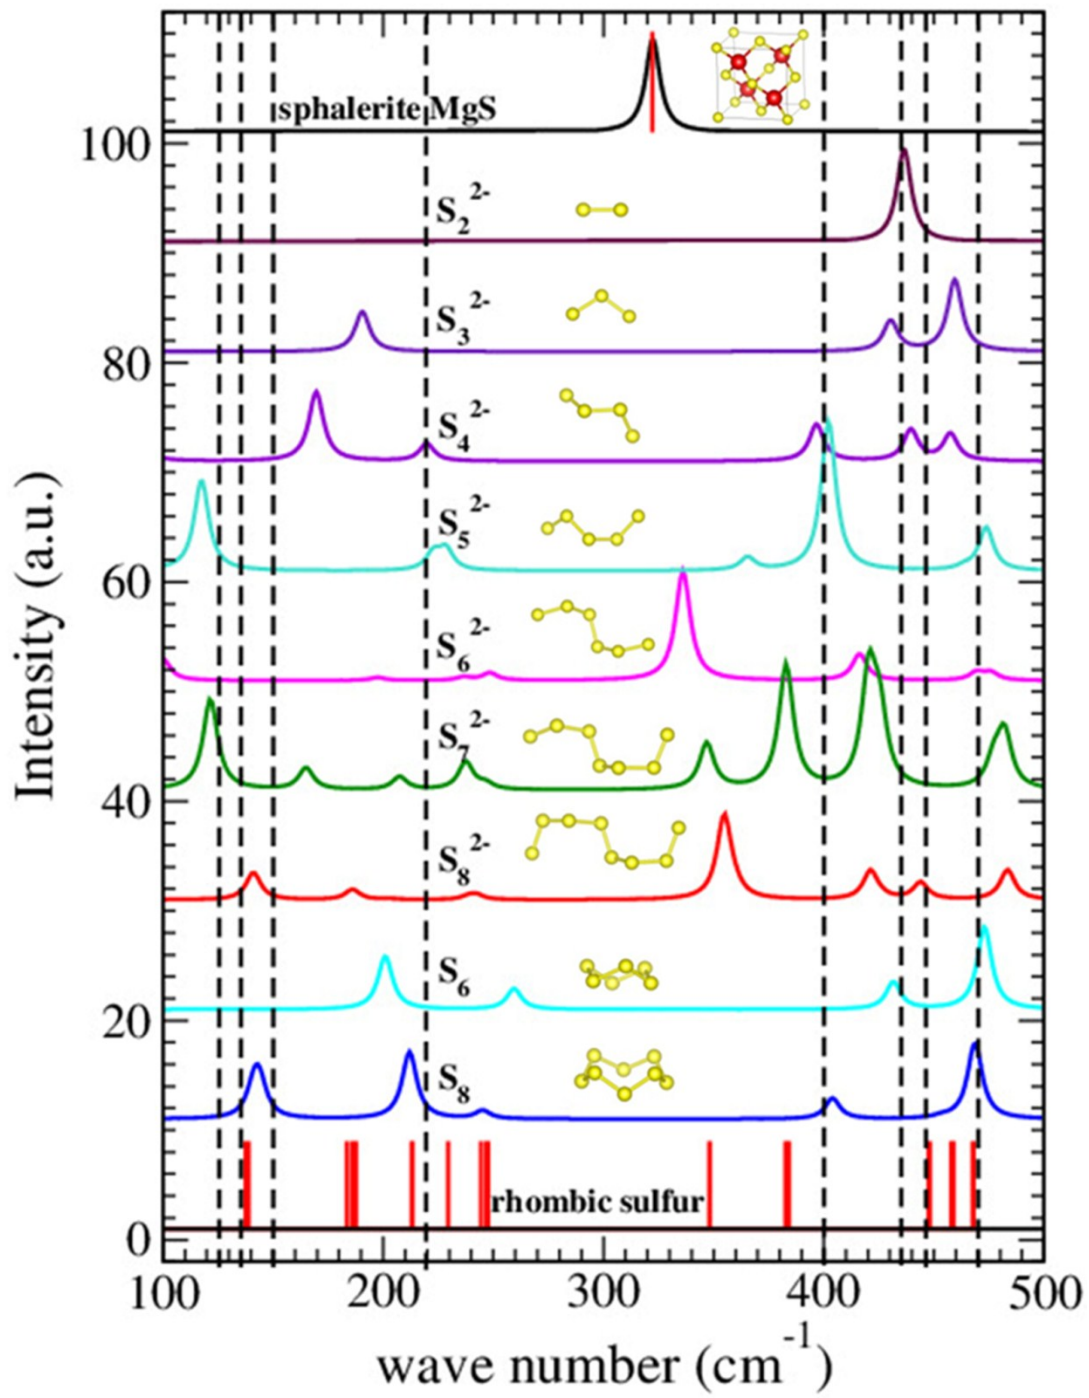



**(b)**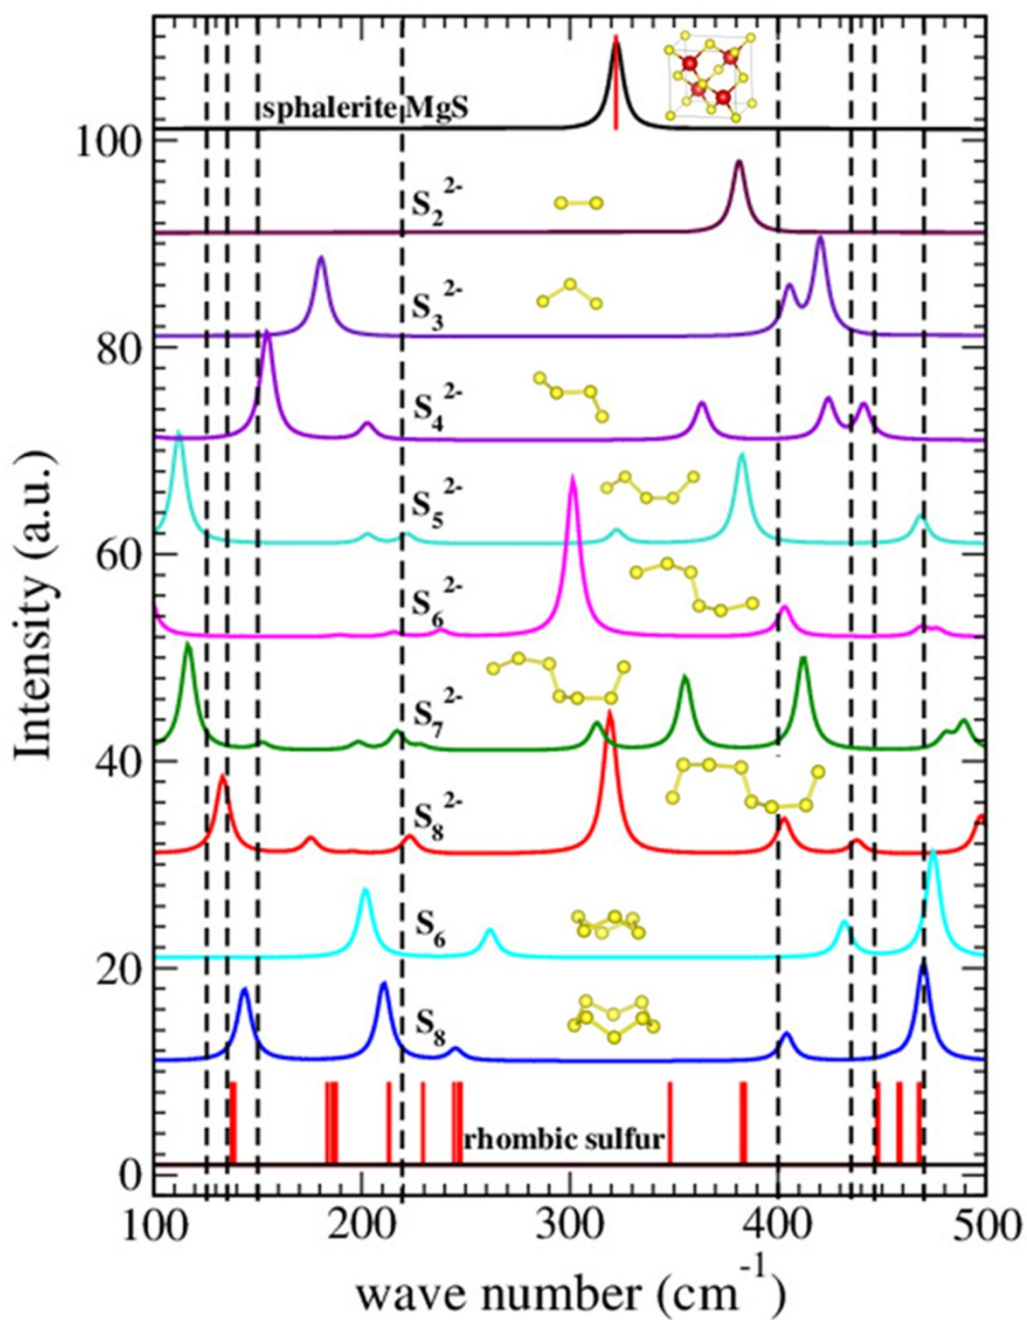

**Fig. S8:** Raman spectra of different polysulfide di-anions, elemental sulfur and sphalerite MgS as obtained from DFT. The depicted spectra correspond to the conformers that were found to be energetically most favorable. In (a) the polysulfide calculations consider the impact of the electrolyte while in (b) vacuum is assumed. Dashed lines correspond to experimentally observed frequencies.

(a)

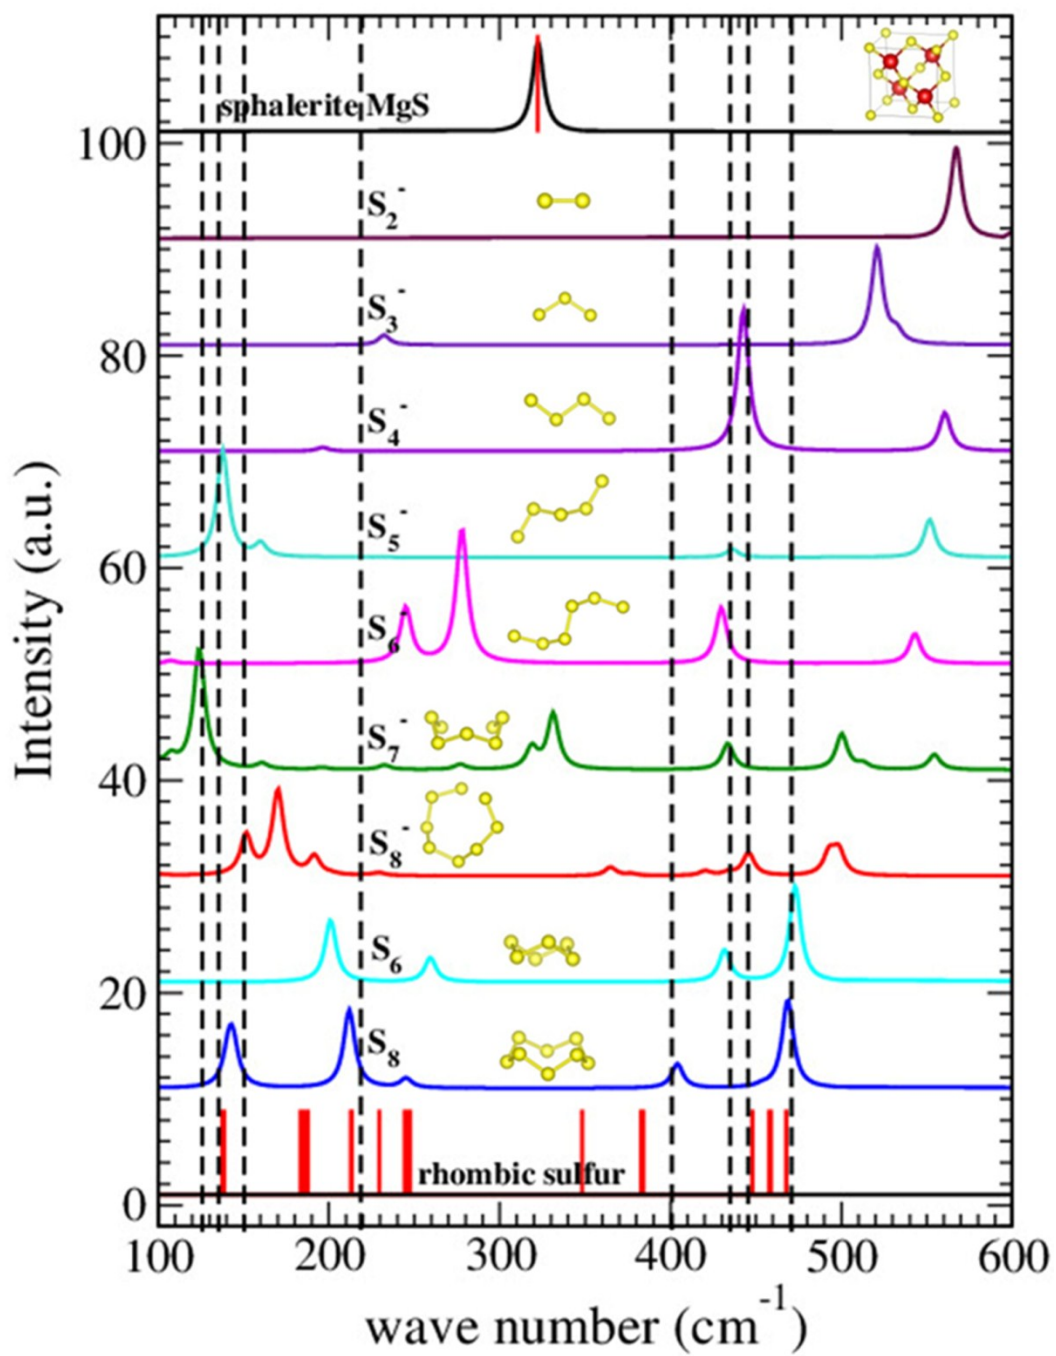

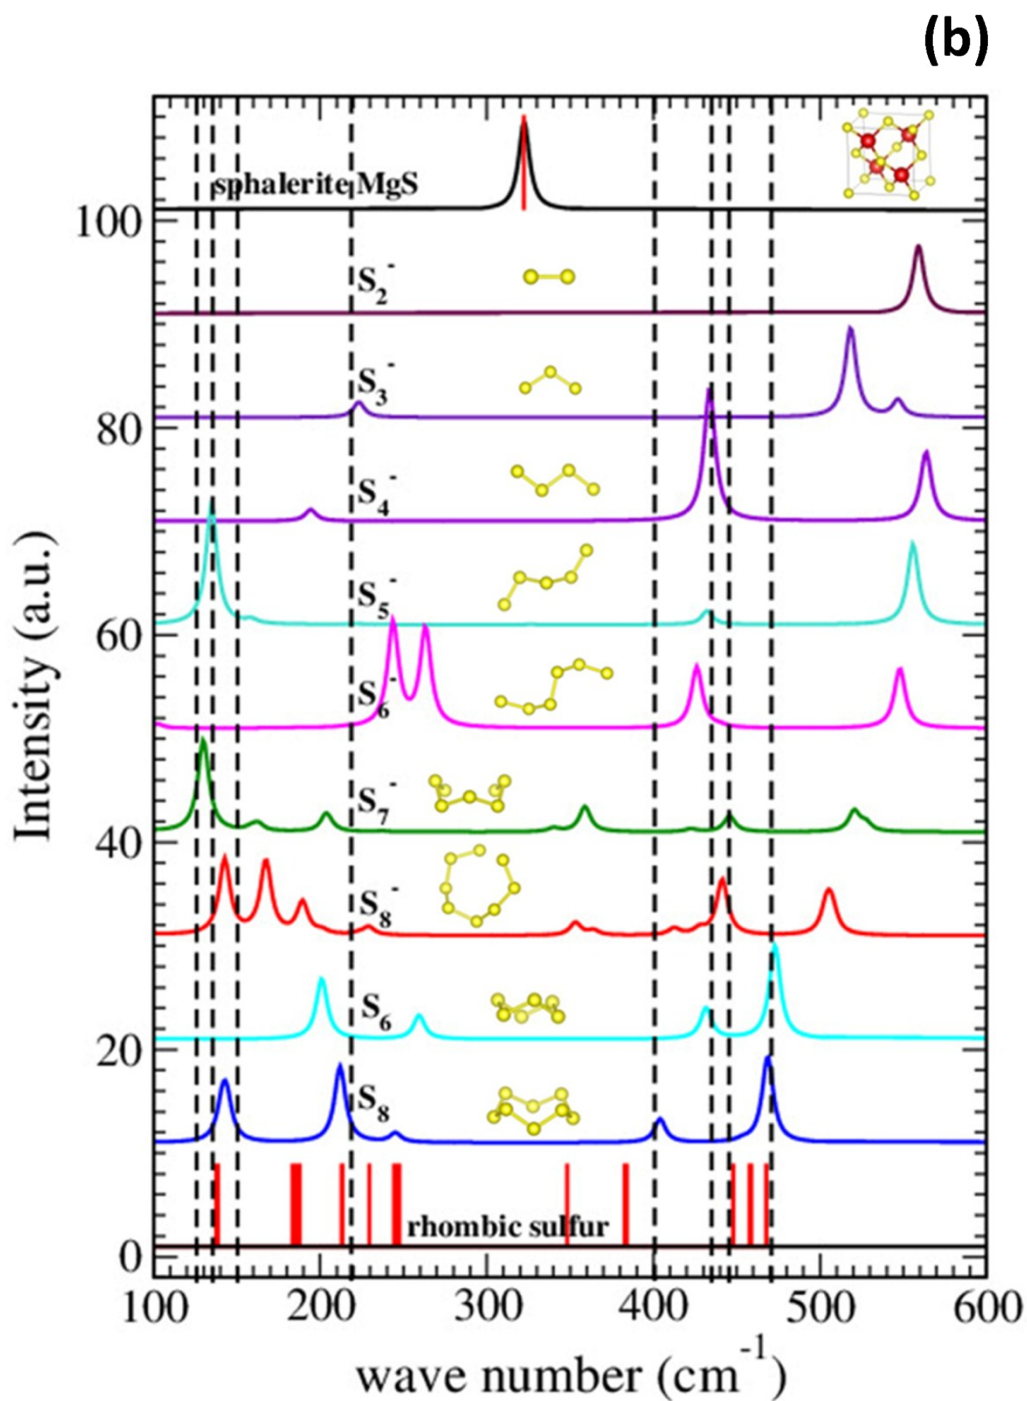

**Fig. S9:** Raman spectra of different polysulfide mono-anions, elemental sulfur and sphalerite MgS as obtained from DFT. The depicted spectra correspond to the conformers that were found to be energetically most favorable. In (a) the polysulfide calculations consider the impact of the electrolyte while in (b) vacuum is assumed. Dashed lines correspond to experimentally observed frequencies.

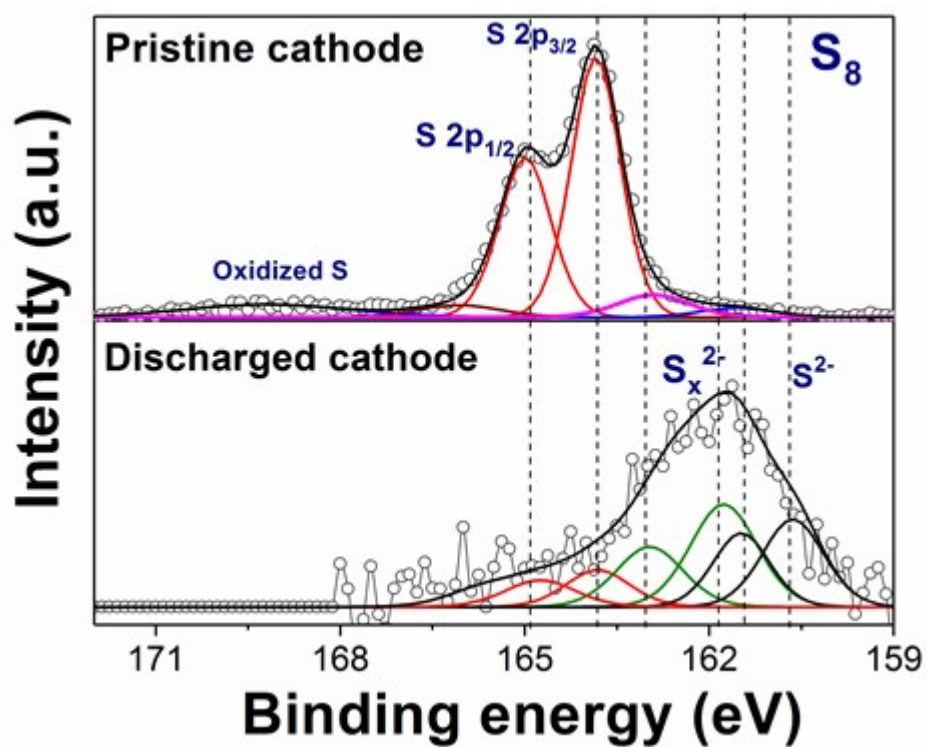

Fig. S10: S<sub>2p</sub> XP spectra for the pristine sulfur cathode and the discharged cathode at 0.5V.

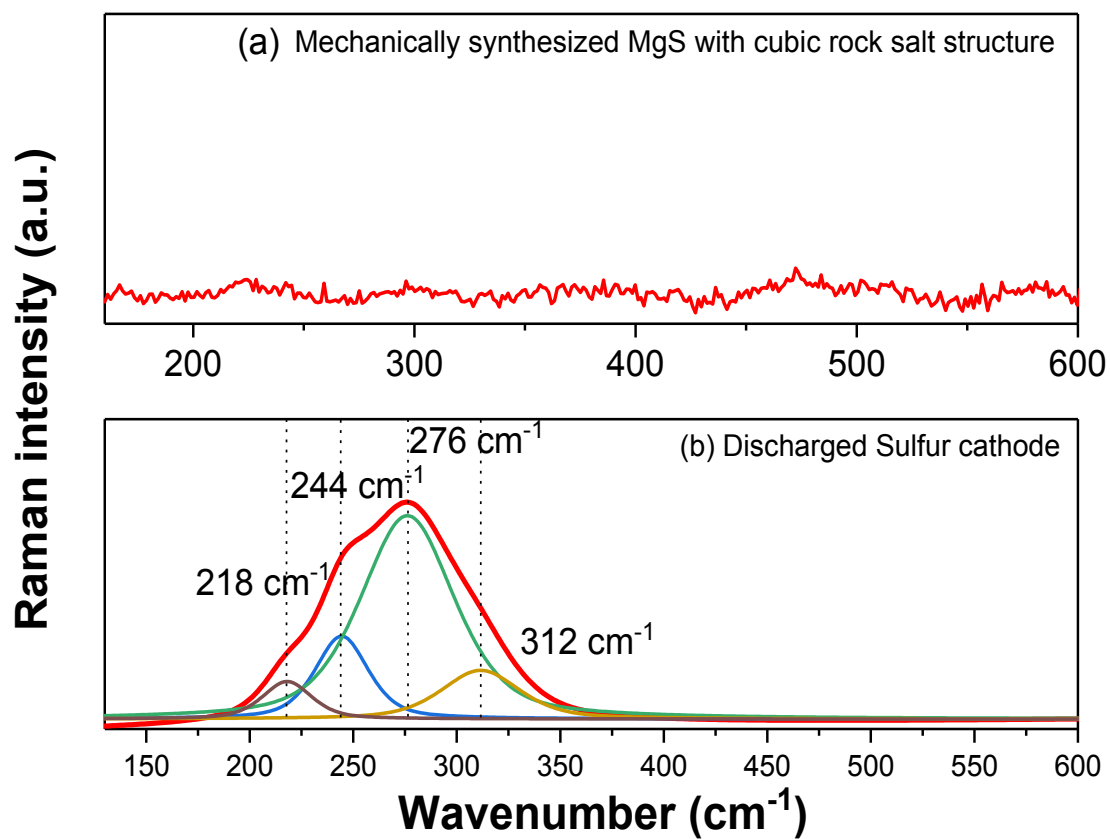

**Fig. S11:** Raman spectra for (a) mechanically synthesized MgS with cubic rock salt structure and (b) discharged sulfur cathode.

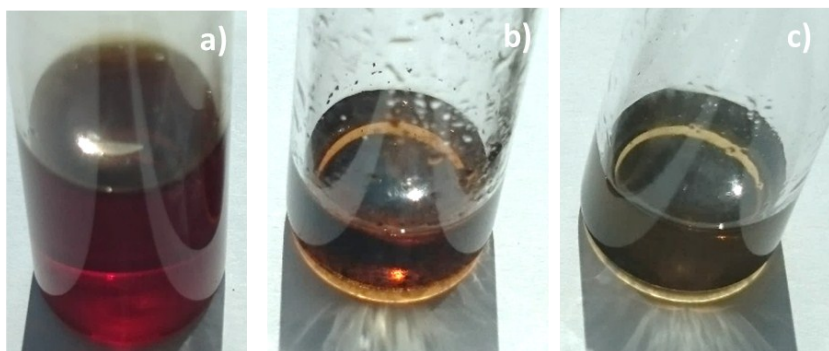

**Fig. S12:** (a) Mg polysulfide solution as prepared, (b) after treating with pristine G-MWCNT, and (c) after treating with nitrogen functionalized (G-MWCNT) for two days.

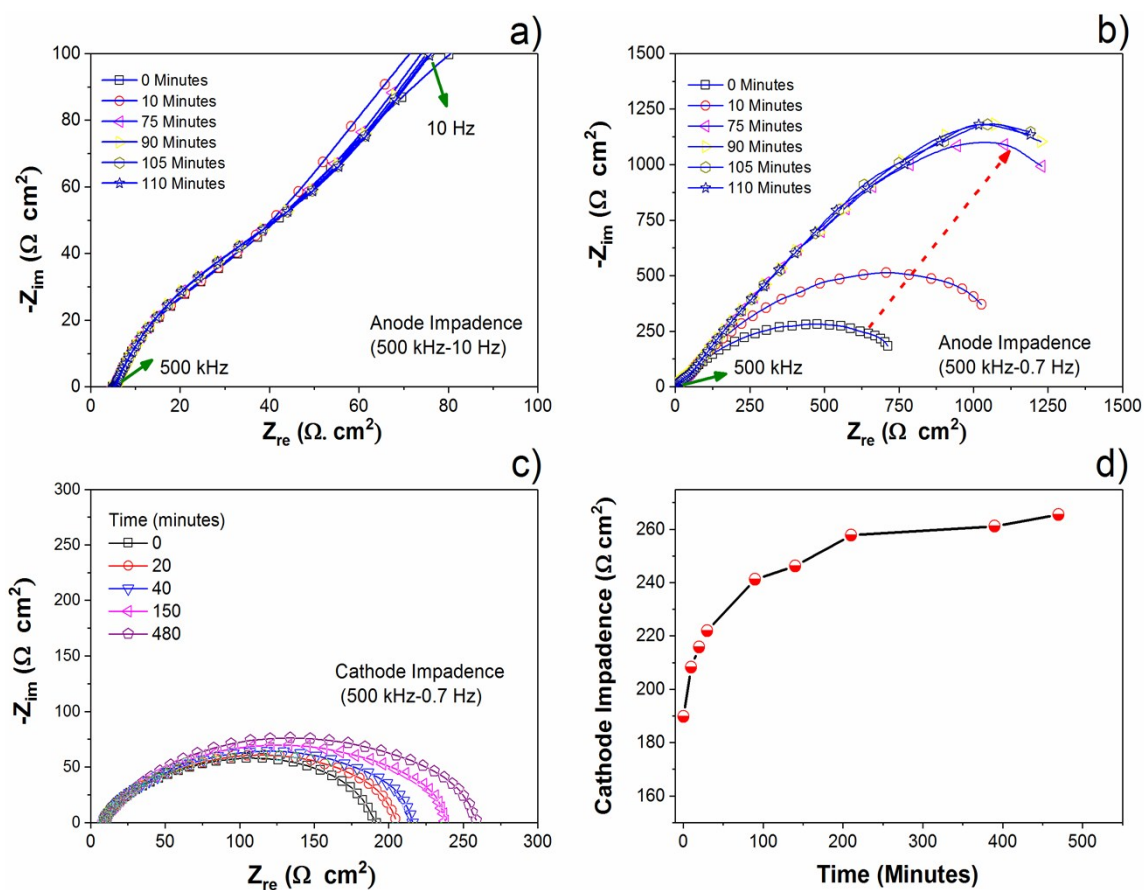

**Fig. S13:** Impedance spectra of the Mg anode of an Mg/S cell at OCV under different resting periods in the frequency range (a) 500 kHz -10 Hz, and (b) 500 kHz – 0.7Hz.

(c, d) Impedance spectra and the variation of impedance of the sulfur cathode of an Mg/S cell at OCV under different resting periods.

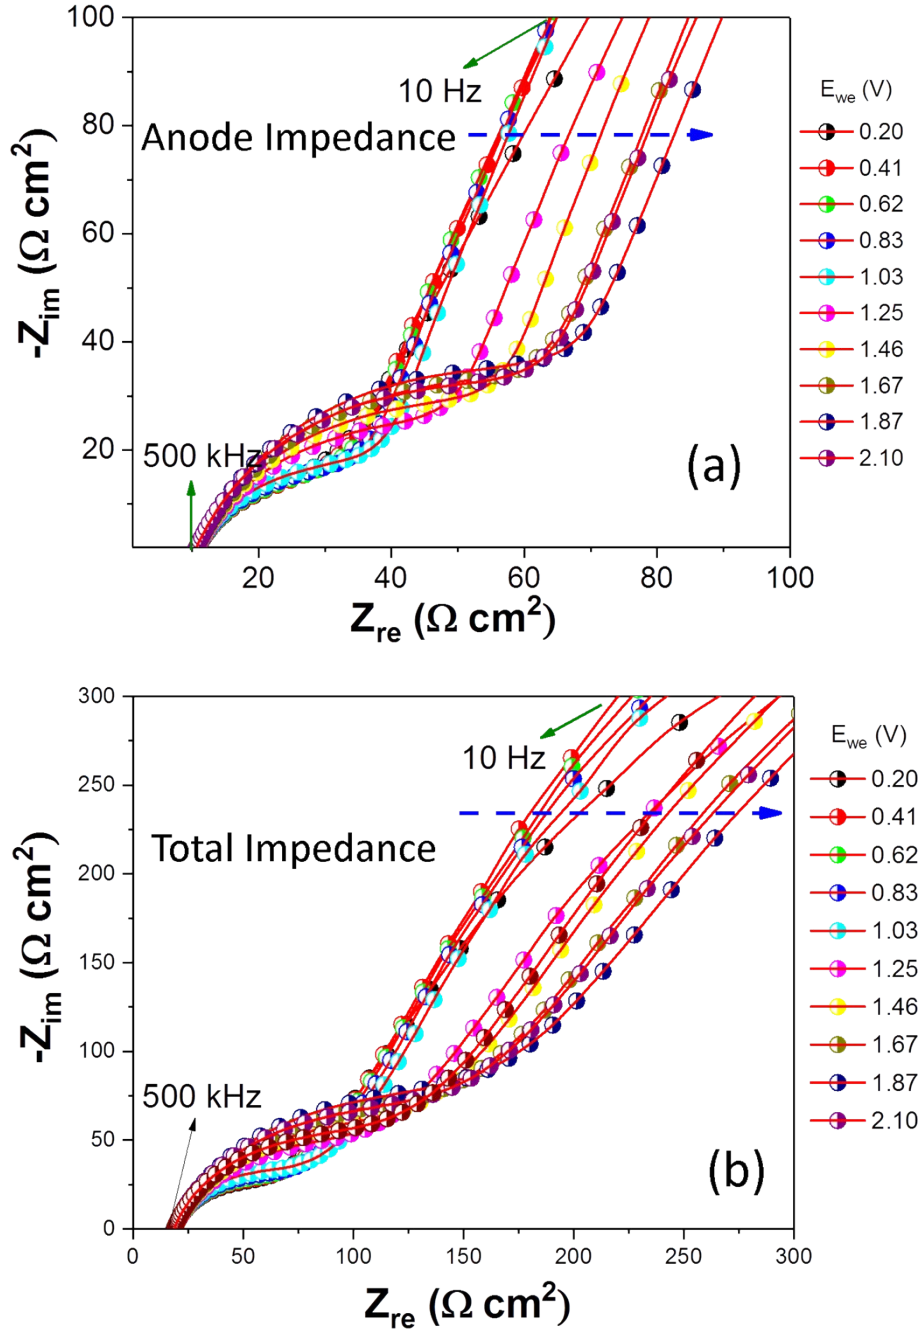

**Fig. S14:** Changes in the impedance spectra of the (a) Mg anode and (b) total Mg/S cell impedance under different cathode potentials over the frequency range 500 kHz -10 Hz. The spectra were collected during the charge of Mg/S cell.



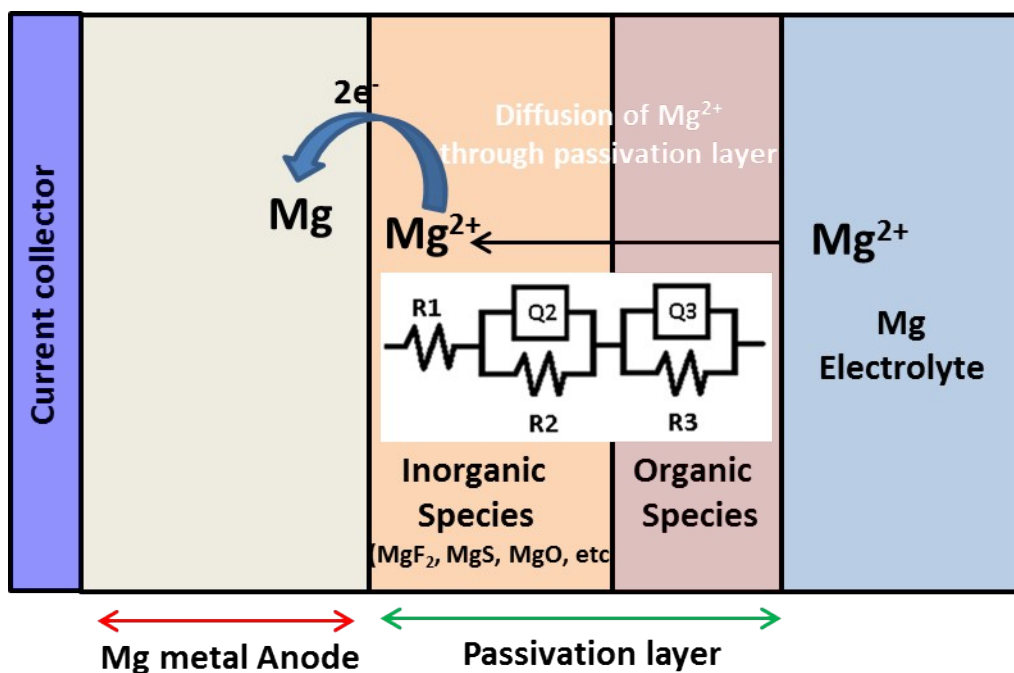

**Fig. S15:** The equivalent circuit for the Mg anode side of an Mg/S cell.

|                                                 |          |          |          |          |          |          |          |          |          |          |
|-------------------------------------------------|----------|----------|----------|----------|----------|----------|----------|----------|----------|----------|
| <b>Voltage (V)</b>                              | 2.1      | 1.87     | 1.67     | 1.46     | 1.25     | 1.03     | 0.83     | 0.62     | 0.41     | 0.2      |
| <b>R1 (<math>\Omega \text{ cm}^{-2}</math>)</b> | 9.7      | 9.7      | 9.7      | 9.7      | 9.8      | 9.6      | 9.5      | 9.5      | 9.5      | 9.5      |
| <b>Q2-Yo</b>                                    | 4.75E-05 | 5.30E-05 | 6.15E-05 | 7.24E-05 | 7.07E-05 | 8.25E-05 | 0.000102 | 0.000106 | 0.000121 | 0.000115 |
| <b>Q2-n</b>                                     | 0.82     | 0.81     | 0.79     | 0.78     | 0.78     | 0.76     | 0.74     | 0.74     | 0.73     | 0.73     |
| <b>R2 (<math>\Omega \text{ cm}^{-2}</math>)</b> | 55.1     | 59.6     | 57.5     | 53.3     | 48.0     | 45.6     | 46.0     | 38.6     | 33.6     | 27.5     |
| <b>Q3-Yo</b>                                    | 0.000152 | 0.000149 | 0.000148 | 0.000153 | 0.000166 | 0.000167 | 0.000155 | 0.00017  | 0.000179 | 0.000196 |
| <b>Q3-n</b>                                     | 0.90     | 0.91     | 0.91     | 0.90     | 0.87     | 0.87     | 0.89     | 0.87     | 0.86     | 0.84     |
| <b>R3 (<math>\Omega \text{ cm}^{-2}</math>)</b> | 2714.9   | 2823.7   | 2932.5   | 3155.2   | 3697.5   | 2165.8   | 1609.7   | 1475.3   | 1084.3   | 681.0    |

**Table S1:** The equivalent circuit fitting values for the Mg anode impedances for the cathode discharge potentials from 2.1V to 0.2V
